# Supplementary material for: The use of a systems approach to increase NAD+ in human participants
Source: PubMed Central journal article supplement (PMC10834541; doi:10.1038/s41514-023-00134-0), 2024-02-01
Supplement: 41514_2023_134_MOESM1_ESM.pdf [file 41514_2023_134_MOESM1_ESM.pdf]

## Supplementary information

Supplementary Table 1. Participant ages and genders, showing which of the 9 different measures made in the study were on samples from each participant.

| Participant no. | Age | Gender | NAD <sup>+</sup> Assay (n=23) | NAD <sup>+</sup> LC-MS (n=17) | Cytokine Assay (n=16) | Protein Glycation (n=24) | IgG Glycosylation (n=24) | WB - NAMPT (n=21) | WB - SIRT1 (n=18) | WB - PGC1α (n=17) | WB - CD38 (n=19) |
|-----------------|-----|--------|-------------------------------|-------------------------------|-----------------------|--------------------------|--------------------------|-------------------|-------------------|-------------------|------------------|
| 1               | 42  | Female |                               |                               |                       | yes                      | yes                      | yes               | yes               |                   |                  |
| 2               | 72  | Female | Yes                           | yes                           |                       | yes                      | yes                      |                   |                   |                   |                  |
| 3               | 34  | Female | Yes                           | yes                           |                       |                          |                          |                   |                   |                   |                  |
| 4               | 29  | Female | Yes                           | yes                           | yes                   | yes                      | yes                      | yes               |                   |                   | yes              |
| 5               | 21  | Female |                               |                               | yes                   | yes                      | yes                      | yes               | yes               |                   |                  |
| 7               | 62  | Female | Yes                           | yes                           |                       | yes                      | yes                      | yes               | yes               | yes               | yes              |
| 9               | 51  | Female | Yes                           | yes                           |                       | yes                      | yes                      | yes               | yes               | yes               | yes              |
| 10              | 53  | Female | Yes                           | yes                           | yes                   | yes                      | yes                      |                   |                   |                   |                  |
| 11              | 40  | Female | Yes                           | yes                           | yes                   | yes                      | yes                      | yes               | yes               | yes               | yes              |
| 12              | 43  | Female | Yes                           | yes                           |                       | yes                      | yes                      | yes               | yes               | yes               | yes              |
| 14              | 39  | Female | Yes                           | yes                           | yes                   | yes                      | yes                      | yes               | yes               | yes               | yes              |
| 15              | 41  | Female | Yes                           | yes                           | yes                   | yes                      | yes                      | yes               | yes               | yes               | yes              |
| 17              | 59  | Female | Yes                           |                               | yes                   | yes                      | yes                      | yes               | yes               | yes               | yes              |
| 18              | 22  | Female | Yes                           | yes                           | yes                   | yes                      | yes                      | yes               | yes               | yes               | yes              |
| 19              | 52  | Female | Yes                           |                               |                       | yes                      | yes                      |                   |                   |                   |                  |
| 20              | 60  | Female | Yes                           |                               | yes                   | yes                      | yes                      | yes               | yes               | yes               | yes              |
| 21              | 49  | Female | Yes                           | yes                           | yes                   | yes                      | yes                      | yes               | yes               | yes               | yes              |
| 22              | 23  | Male   | Yes                           |                               | yes                   | yes                      | yes                      | yes               | yes               | yes               | yes              |
| 23              | 61  | Male   | Yes                           | yes                           | yes                   | yes                      | yes                      | yes               | yes               | yes               | yes              |
| 24              | 44  | Male   | Yes                           | yes                           | yes                   | yes                      | yes                      | yes               | yes               | yes               | yes              |
| 25              | 60  | Female | Yes                           | yes                           |                       | yes                      | yes                      | yes               | yes               |                   | yes              |
| 26              | 66  | Male   | Yes                           |                               | yes                   | yes                      | yes                      | yes               | yes               | yes               | yes              |
| 27              | 68  | Male   | Yes                           | yes                           |                       | yes                      | yes                      | yes               |                   | yes               | yes              |
| 28              | 62  | Male   | Yes                           |                               | yes                   | yes                      | yes                      | yes               | yes               | yes               | yes              |
| 29              | 39  | Male   | Yes                           | yes                           | yes                   | yes                      | yes                      | yes               | yes               | yes               | yes              |

Supplementary Table 2. Age profile and gender split of study participants

|                                      |          |
|--------------------------------------|----------|
| Participants who completed the study | 25       |
| Average Age                          | 48       |
| Median Age                           | 49       |
| 20-39 Age group                      | 7 (28%)  |
| 40-59 Age group                      | 10 (40%) |
| 60+ Age group                        | 8 (32%)  |
| Total Females                        | 17 (72%) |
| Total Males                          | 8 (28%)  |

Supplementary Table 3. Adverse effects reported by study participants.

| Major Adverse Events | Minor Adverse Events | Condition | N      |
|----------------------|----------------------|-----------|--------|
| none                 | Stomach Irritation   | NT        | 1 (4%) |
|                      | Trouble Sleeping     | NT        | 2 (8%) |
|                      | Hyperactivity        | placebo   | 1 (4%) |

Supplementary Table 4. Comparison by participant of the measured change in NAD<sup>+</sup> concentration in whole blood from baseline, expressed as a percentage, by enzymatic assay and LC-MS.

| Participant no. | Age | Gender | Change from baseline by enzymatic assay (%) |                |           |           | Change from baseline by LC-MS (%) |                |           |           |
|-----------------|-----|--------|---------------------------------------------|----------------|-----------|-----------|-----------------------------------|----------------|-----------|-----------|
|                 |     |        | Placebo Week 3                              | Placebo Week 4 | NT Week 3 | NT Week 4 | Placebo Week 3                    | Placebo Week 4 | NT Week 3 | NT Week 4 |
| 2               | 72  | F      | 102.22                                      | 98.15          | 120.87    | 103.43    | 89.48                             | 67.05          | 122.82    | 187.39    |
| 3               | 34  | F      | 110.06                                      | 109.24         | 103.05    | 131.76    | 131.21                            | 134.88         | 182.52    | 174.39    |
| 4               | 29  | F      | 107.00                                      | 111.19         | 90.21     | 84.89     | 160.91                            | 148.76         | 97.74     | 159.15    |
| 7               | 62  | F      | 88.57                                       | 107.45         | 136.68    | 138.67    | 81.73                             | 88.36          | 79.89     | 83.63     |
| 9               | 51  | F      | 86.97                                       | 97.74          | 124.10    | 131.08    | 85.12                             | 58.00          | 144.35    | 252.89    |
| 10              | 53  | F      | 99.13                                       | 103.08         | 124.97    | 142.26    | 97.08                             | 81.09          | 79.37     | 48.91     |
| 11              | 40  | F      | 96.81                                       | 105.99         | 165.61    | 165.15    | 138.42                            | 121.57         | 117.65    | 125.93    |
| 12              | 43  | F      | 93.50                                       | 100.27         | 113.41    | 106.37    | 138.12                            | 137.05         | 85.87     | 83.92     |
| 14              | 39  | F      | 103.72                                      | 106.10         | 120.39    | 124.85    | 119.62                            | 113.65         | 94.27     | 89.64     |
| 15              | 41  | F      | 51.37                                       | 56.30          | 125.37    | 112.90    | 131.45                            | 118.84         | 123.74    | 137.61    |
| 18              | 22  | F      | 101.98                                      | 105.03         | 116.74    | 165.54    | 117.05                            | 127.77         | 118.48    | 177.55    |
| 21              | 49  | F      | 101.61                                      | 99.93          | 118.35    | 108.39    | 98.17                             | 128.96         | 148.41    | 161.90    |
| 23              | 61  | M      | 123.42                                      | 133.59         | 203.57    | 162.55    | 57.51                             | 76.31          | 114.88    | 116.93    |
| 24              | 44  | M      | 97.97                                       | 97.21          | 87.95     | 78.69     | 111.04                            | 98.79          | 110.85    | 112.52    |
| 25              | 60  | F      | 105.89                                      | 112.76         | 115.57    | 107.82    | 187.34                            | 115.46         | 106.25    | 93.72     |
| 27              | 68  | M      | 104.88                                      | 119.71         | 88.82     | 92.54     | 105.15                            | 102.33         | 112.28    | 101.16    |
| 29              | 39  | M      | 81.87                                       | 86.05          | 92.82     | 105.11    | 107.13                            | 97.83          | 80.79     | 97.76     |

Supplementary Table 5. Antibody sources and dilutions.

| Primary antibodies           |                                       |                                            |
|------------------------------|---------------------------------------|--------------------------------------------|
| Target antigen               | Supplier and catalogue number         | Dilution                                   |
| SIRT1                        | Proteintech, Cat. No. 60303-1-Ig,     | 1:500 in TBST; 5% skimmed milk             |
| NAMPT                        | Proteintech, Cat. No. 11776-1-AP      | 1:500 in TBST; 5% skimmed milk             |
| PGC1 $\alpha$                | Proteintech, Cat. No. 66369-1-Ig      | 1:500 in TBST; 5% skimmed milk             |
| CD38                         | Proteintech, Cat. No. 60006-1-Ig      | 1:500 in TBST; 5% skimmed milk             |
| ACTB                         | Proteintech, Cat. No. 60008-1-Ig      | 1:10,000 in TBST; 5% skimmed milk          |
| Secondary antibodies         |                                       |                                            |
| Conjugate                    | Supplier and catalogue number         | Dilution                                   |
| Horseradish peroxidase (HRP) | <sup>1</sup> Dako, Cat. No. P044701-2 | <sup>3</sup> 1:2000 or <sup>4</sup> 1:5000 |
| Horseradish peroxidase (HRP) | <sup>2</sup> Dako, Cat. No. P044801-2 | 1:2000                                     |

<sup>1</sup>For detection of all primary antibodies except NAMPT

<sup>2</sup>For detection of NAMPT primary antibody

<sup>3</sup>For detection of all primary antibodies except ACTB

<sup>4</sup>For detection of ACTB primary antibody

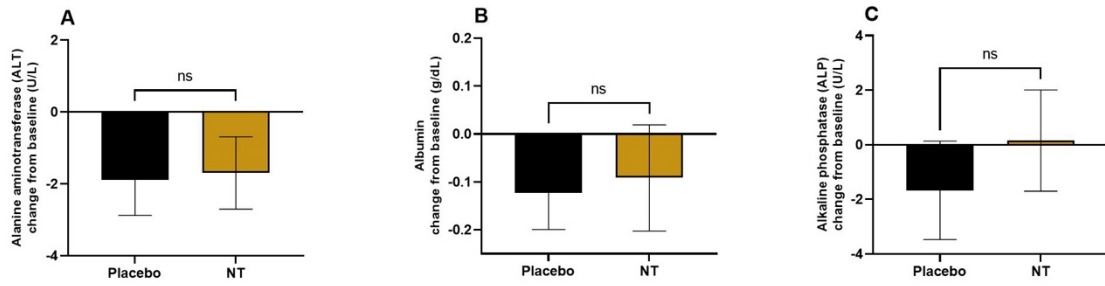

Supplementary Figure 1. Measurements of alanine aminotransferase and alkaline phosphatase and the concentration of albumin in plasma samples after 28 d on placebo or NT. Data are shown relative to baseline as mean  $\pm$  SEM, n=24. NS – not significant ( $P>0.05$ ) by Student's paired t-test.

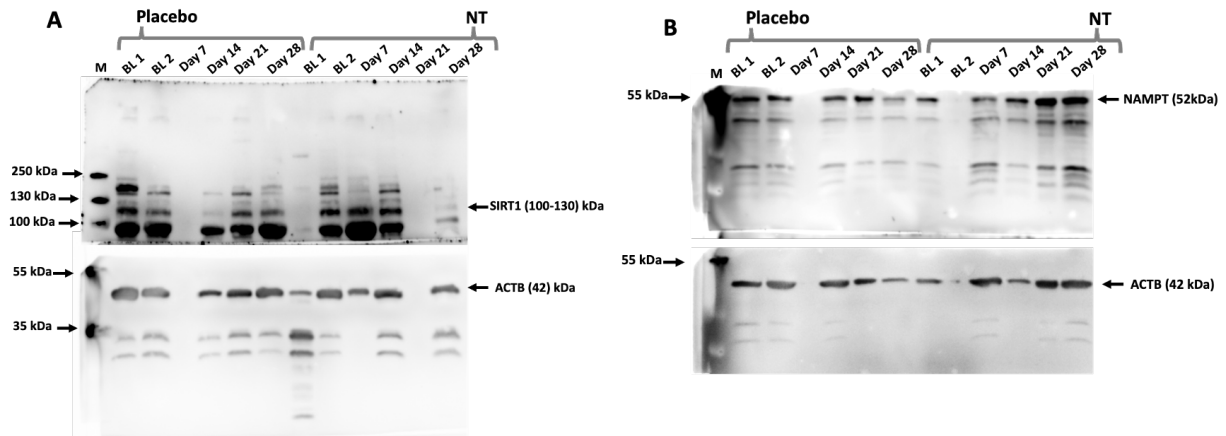

Supplementary Figure 2. Uncropped blots for SIRT1 (Panel A) and NAMPT (Panel B), and corresponding ACTB loading controls. Samples are as labelled. M – molecular weight marker (PageRuler; 10-250kDa)
